# Supplementary material
Source: PubMed Central journal article supplement (PMC5739943)

# Supporting information

Isolation of the New Antiplasmodial Butanolide  
Malleastrumolide A from a *Malleastrum* sp. (Meliaceae) from  
Madagascar

Yongle Du, Alexander K. Abedi, Ana Lisa Valenciano, Maria L. Fernández-Murga,  
Maria B. Cassera, Vincent E. Rasamison, Wendy L. Applequist, James S. Miller,  
and David G. I. Kingston

<sup>1</sup>H, gHSQC, gHMBC, NOESY spectra and Circular dichroism  
spectra for compound **1**

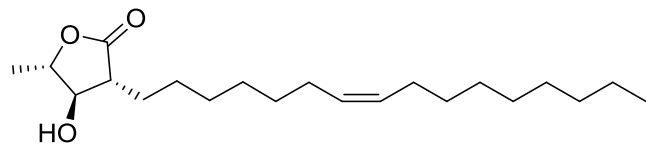

Compound 1 (  $^1\text{H}$  NMR,  $\text{CDCl}_3$  )

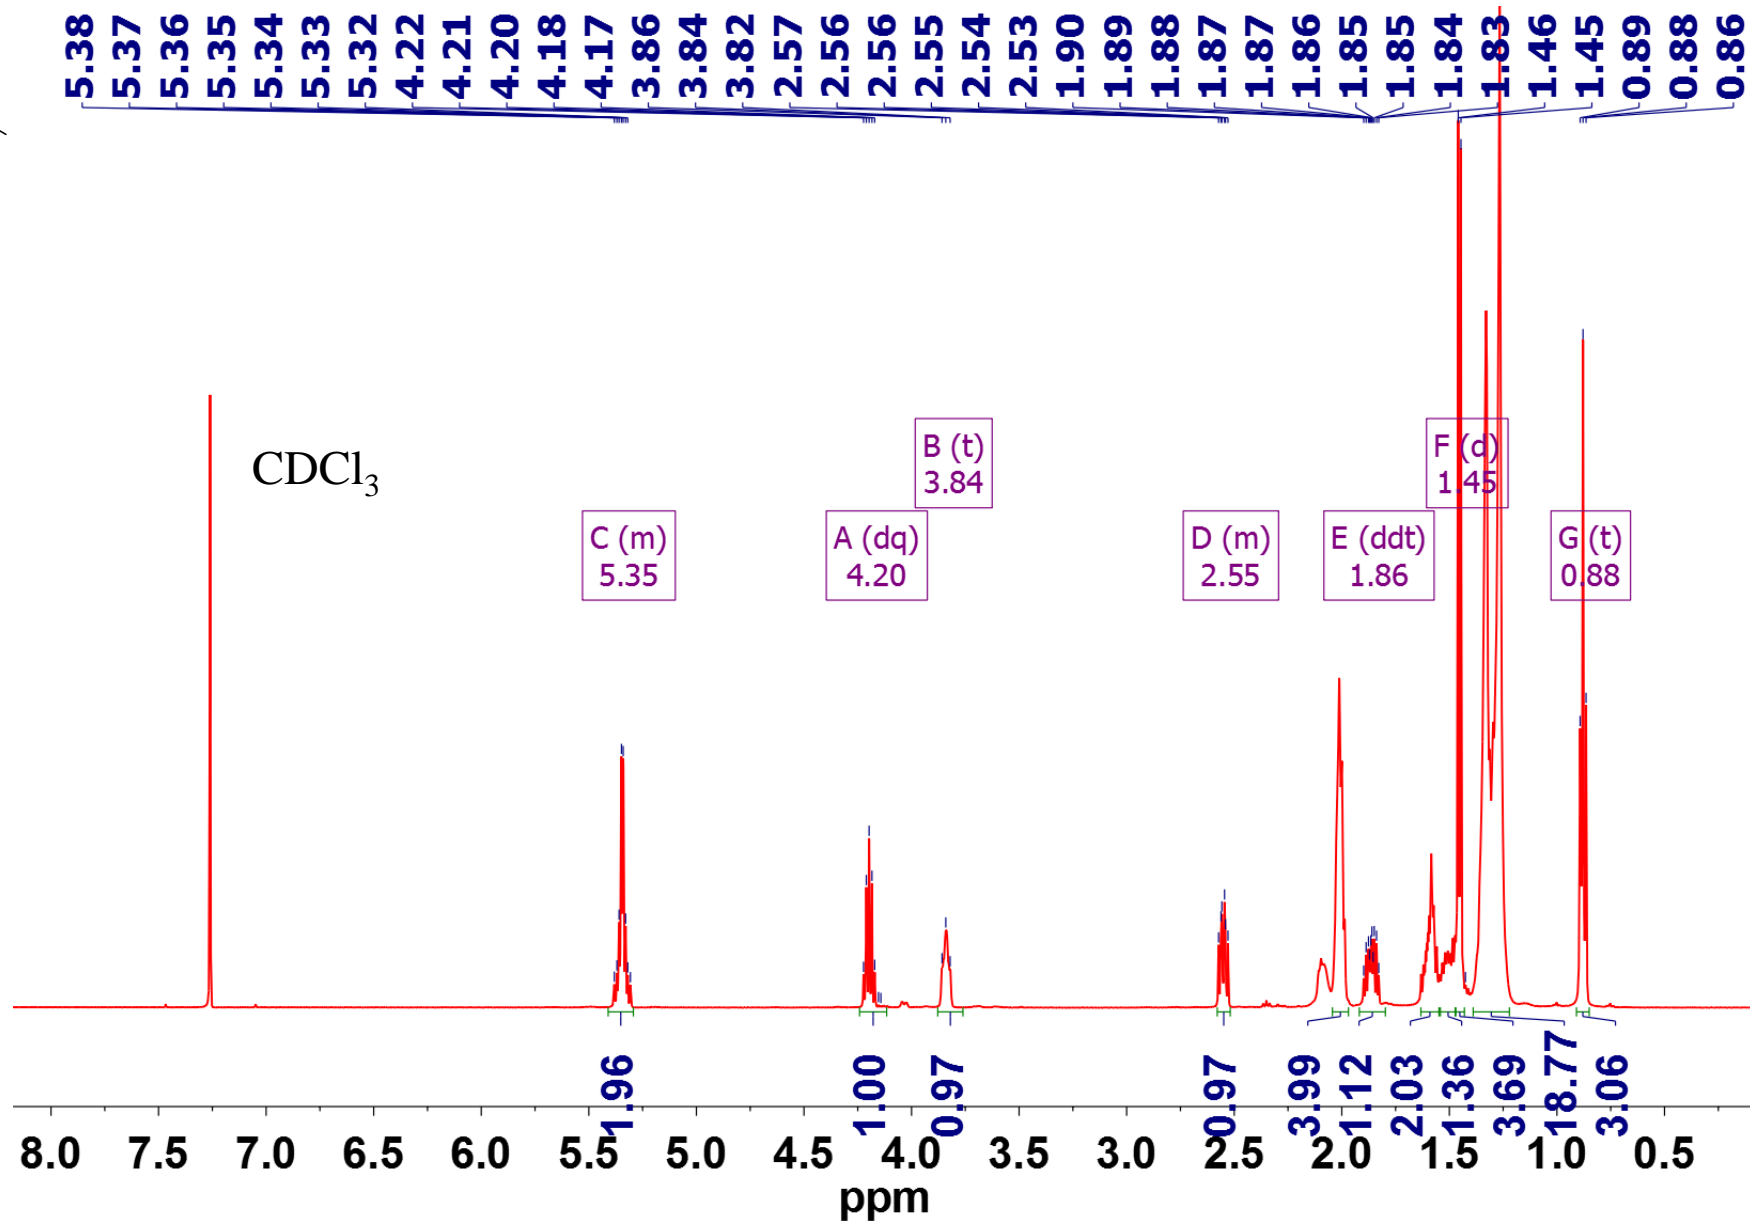



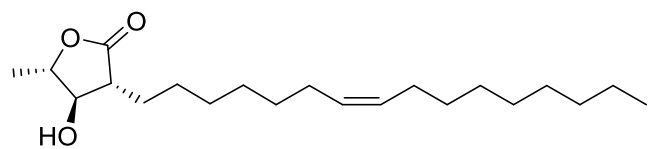

Compound 1 ( gHMBC, CDCl<sub>3</sub> )

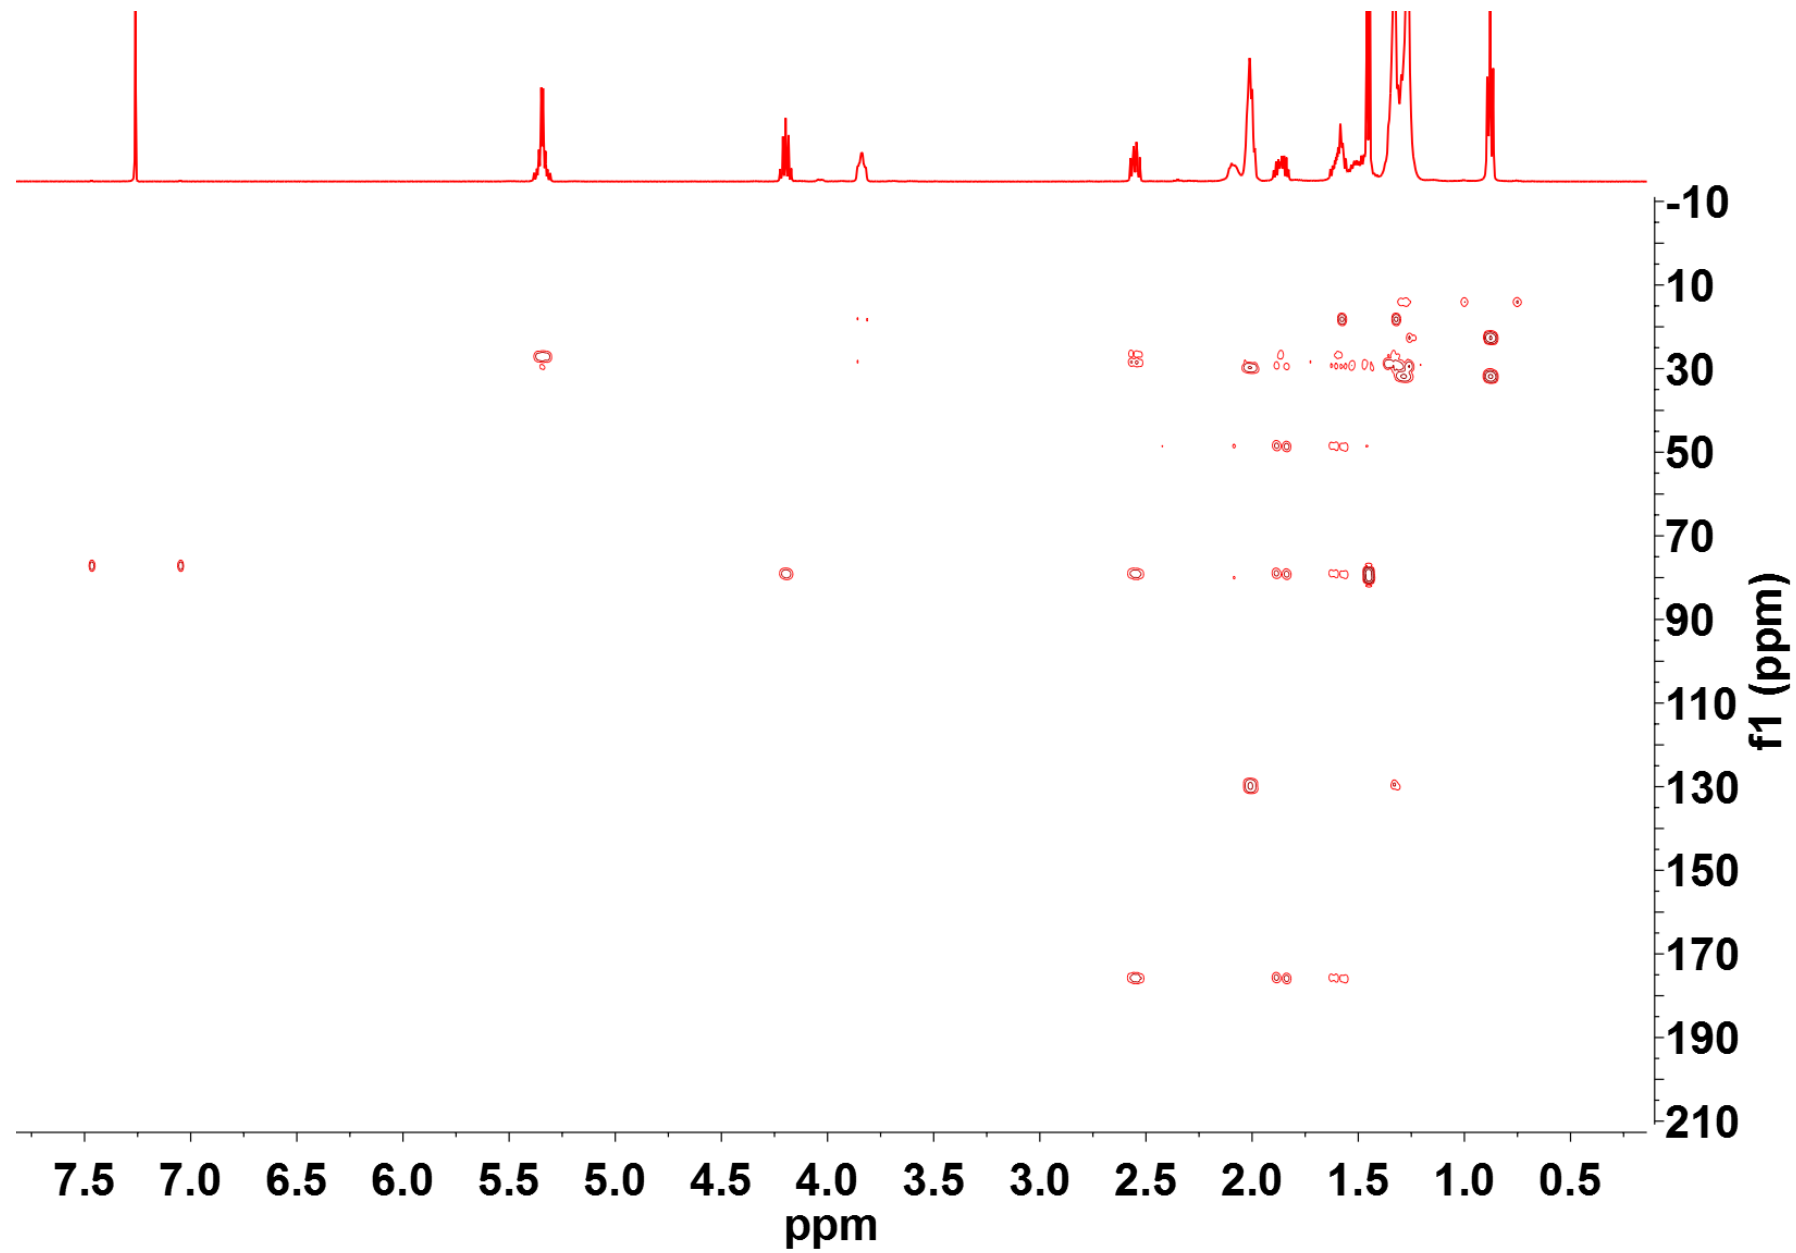

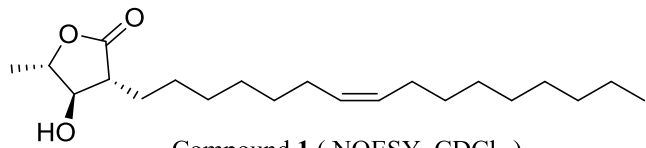

Compound 1 (NOESY, CDCl<sub>3</sub>)

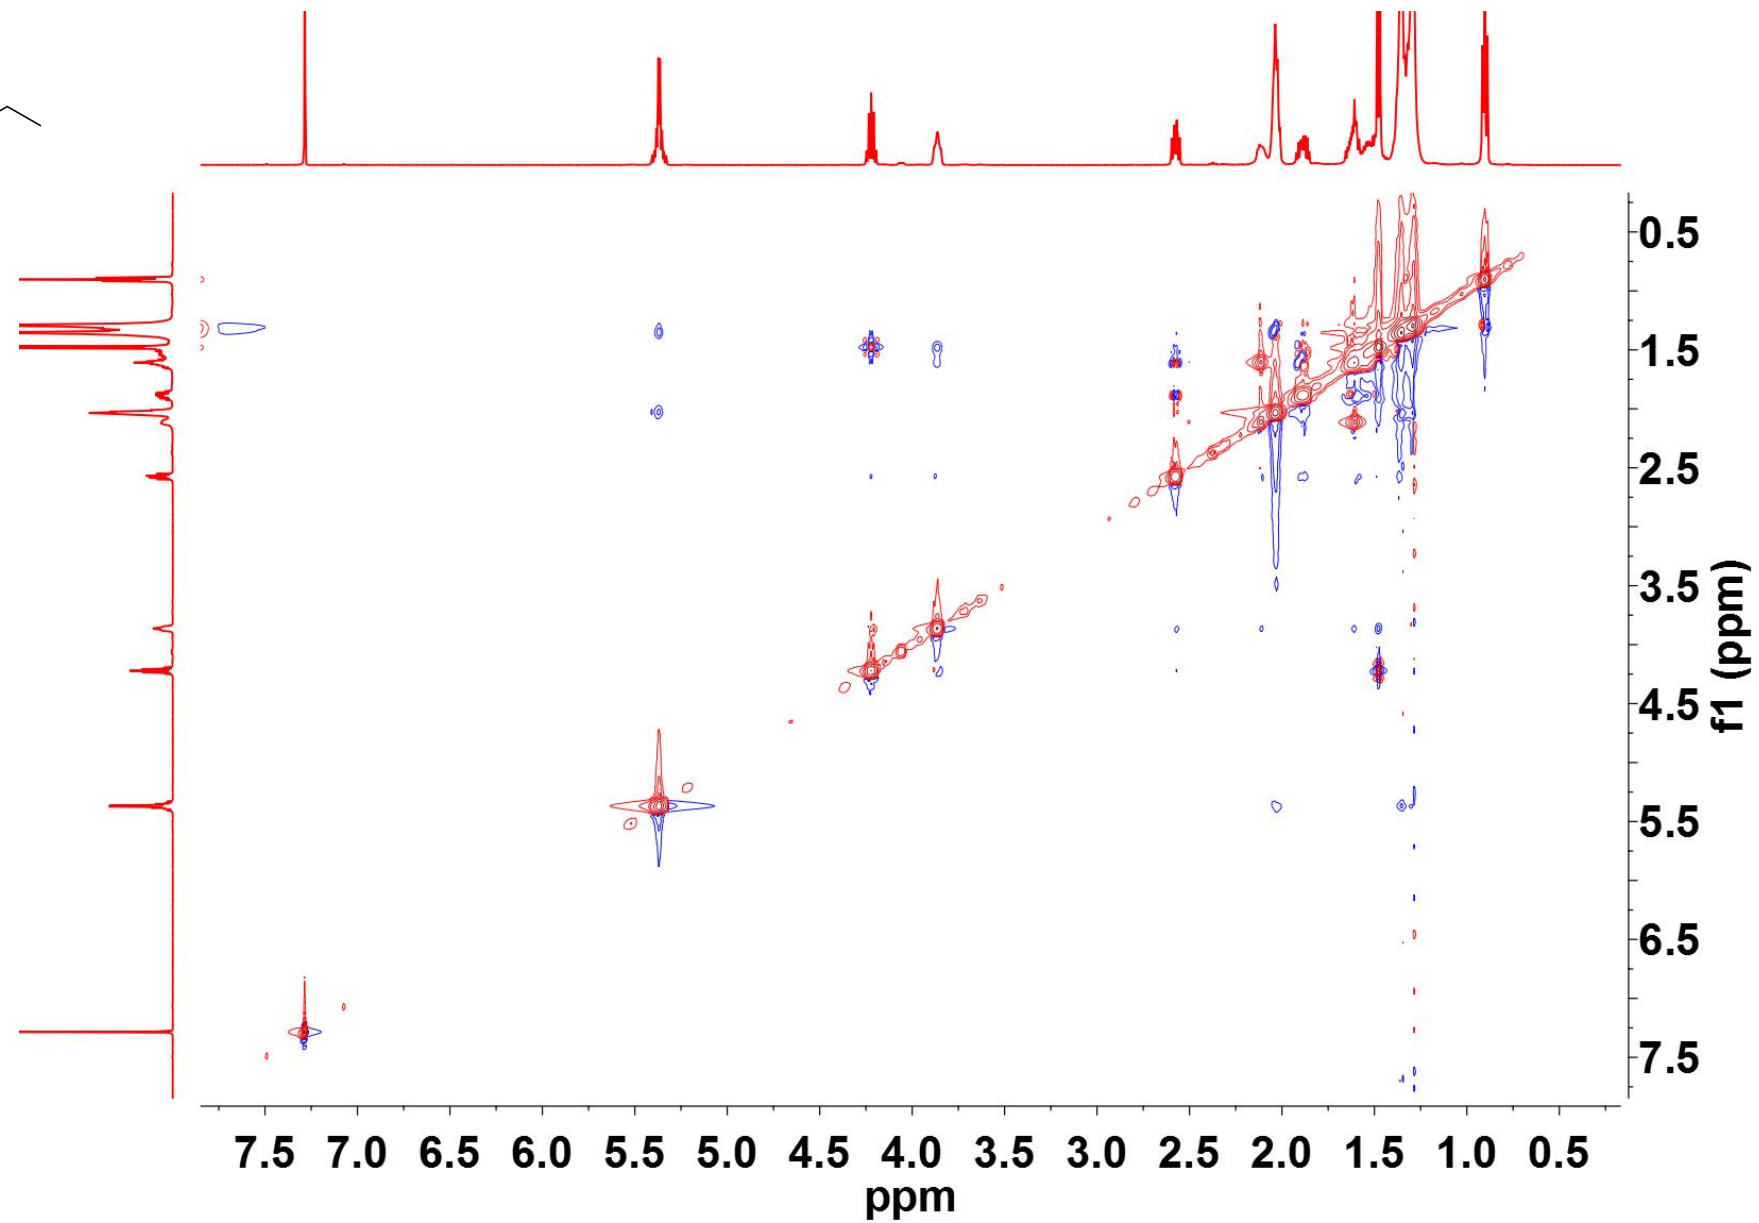

# Circular dichroism spectrum for compound **1**

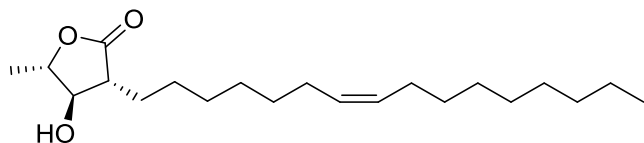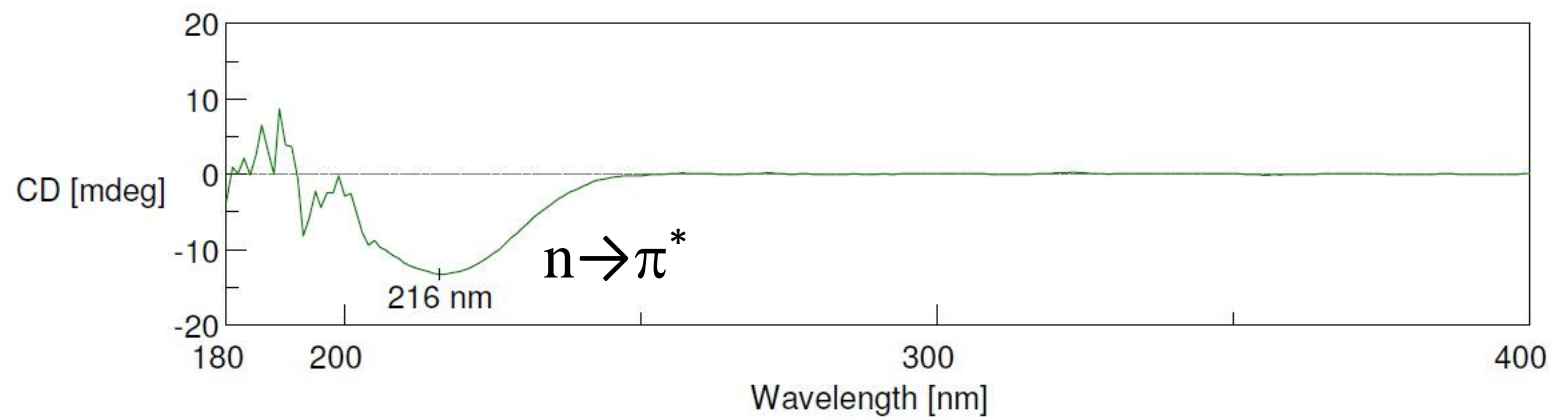

Supplement: NIHMS900631-supplement-Supp_info.pdf [file NIHMS900631-supplement-Supp_info.pdf]
